# Supplementary material for: Invasive Treatment Strategy in Adults With Frailty and Non–ST-Segment Elevation Myocardial Infarction: A Secondary Analysis of a Randomized Clinical Trial
Source: PubMed Central journal article supplement (PMC10918507; doi:10.1001/jamanetworkopen.2024.0809), 2024-03-06
Supplement: jamanetwopen-e240809-s002.pdf [file jamanetwopen-e240809-s002.pdf]

## Supplementary Online Content

Sanchis J, Bueno H, García-Blas S, et al. Invasive treatment strategy in adults with frailty and non–ST-segment elevation myocardial infarction: a randomized clinical trial. *JAMA Netw Open*. 2024;7(3):e240809.  
doi:10.1001/jamanetworkopen.2024.0809

**eTable 1.** Baseline Patient Characteristics

**eTable 2.** Causes of Noncardiac Death

**eTable 3.** Effect of the Invasive Treatment on the Rate of Each Recurrent Event While Adjusting the Estimates for Informative Censoring Due to Death as a Terminal Event

**eFigure 1.** CONSORT Flow Diagram

**eFigure 2.** RMST Curve for All-Cause Mortality

This supplementary material has been provided by the authors to give readers additional information about their work.

**eTable 1.** Baseline Patient Characteristics

|                                      | <b>Invasive</b> | <b>Conservative</b> | <b>Standardized differences</b> |
|--------------------------------------|-----------------|---------------------|---------------------------------|
| <b>N = 167</b>                       | <b>84</b>       | <b>83</b>           |                                 |
| <b>Demographic data</b>              |                 |                     |                                 |
| Age (years)                          | 86 (5)          | 85 (5)              | .218                            |
| Male                                 | 32 (38)         | 47 (57)             | .401                            |
| Diabetes                             | 50 (60)         | 43 (52)             | .155                            |
| Insulin treatment                    | 19 (23)         | 19 (23)             | .006                            |
| Hypertension                         | 77 (92)         | 76 (92)             | .004                            |
| Hypercholesterolemia                 | 63 (75)         | 65 (78)             | .078                            |
| Current smoker                       | 3 (3.6)         | 2 (2.4)             | .230                            |
| Peripheral artery disease            | 9 (11)          | 9 (11)              | .004                            |
| Chronic kidney disease               | 39 (46)         | 35 (42)             | .085                            |
| Dialysis                             | 3 (3.6)         | 2 (2.4)             | .068                            |
| Prior myocardial infarction          | 19 (23)         | 32 (39)             | .349                            |
| Prior PCI                            | 19 (23)         | 33 (40)             | .374                            |
| Prior CABG                           | 5 (6.0)         | 11 (13)             | .248                            |
| Prior history of atrial fibrillation | 26 (31)         | 19 (23)             | .181                            |
| Prior stroke                         | 13 (16)         | 17 (21)             | .203                            |
| Prior admission for heart failure    | 13 (16)         | 16 (19)             | .100                            |
| <b>Hemodynamic data</b>              |                 |                     |                                 |
| Systolic blood pressure (mmHg)       | 139 (27)        | 141 (23)            | .060                            |
| Diastolic blood pressure (mmHg)      | 69 (16)         | 70 (12)             | .105                            |
| Heart rate (beats/min)               | 77 (15)         | 79 (21)             | .095                            |
| Killip class                         |                 |                     | .0049                           |
| I                                    | 67 (80)         | 61 (74)             |                                 |
| II                                   | 11 (13)         | 19 (23)             |                                 |
| III                                  | 6 (7.1)         | 3 (3.6)             |                                 |
| <b>ECG</b>                           |                 |                     |                                 |

|                               |            |            |      |
|-------------------------------|------------|------------|------|
| Normal ECG                    | 26 (31)    | 27 (33)    | .127 |
| ST-segment depression         | 34 (41)    | 25 (30)    | .187 |
| T-wave inversion              | 9 (11)     | 16 (19)    | .043 |
| Left bundle branch block      | 10 (12)    | 10 (12)    | .040 |
| Pacemaker                     | 5 (6.0)    | 5 (6.0)    | .003 |
| <b>Blood test</b>             |            |            |      |
| Haemoglobin (g/dl)            | 12.4 (1.6) | 12.4 (1.8) | .008 |
| Creatinine (mg/dl)            | 1.4 (0.9)  | 1.3 (0.7)  | .056 |
| <b>Geriatric conditions</b>   |            |            |      |
| Clinical Frailty Scale, n (%) |            |            | .073 |
| 4                             | 23 (27)    | 20 (24)    |      |
| 5                             | 32 (38)    | 40 (48)    |      |
| 6                             | 26 (31)    | 22 (27)    |      |
| 7                             | 3 (4)      | 1 (1)      |      |
| Frail scale (points)          | 2.5 (1.2)  | 2.5 (1.1)  | .015 |
| Charlson index (points)       | 2.5 (1.9)  | 3.0 (2.2)  | .234 |
| Barthel index (points)        | 75 (23)    | 75 (20)    | .001 |
| Pfeiffer test (errors)        | 1.8 (2.2)  | 2.0 (2.2)  | .140 |

Continuous variables are presented as mean (SD), and categorical variables as absolute values (%)

Abbreviations: PCI = Percutaneous coronary intervention, CABG: Coronary artery bypass graft

**eTable 2.** Causes of Noncardiac Death

|                                  | <b>Invasive<br/>N=84</b> | <b>Conservative<br/>N=83</b> | <b>Total</b> |
|----------------------------------|--------------------------|------------------------------|--------------|
| <b>Bleeding</b>                  | 5                        | 0                            | 5            |
| During the first year            | 4                        | 0                            |              |
| After the first year             | 1                        | 0                            |              |
| <b>Stroke</b>                    | 4                        | 2                            | 6            |
| During the first year            | 4                        | 1                            |              |
| After the first year             | 0                        | 1                            |              |
| <b>Other neurologic disease</b>  | 3                        | 1                            | 4            |
| During the first year            | 1                        | 0                            |              |
| After the first year             | 2                        | 1                            |              |
| <b>Pulmonary disease</b>         | 4                        | 7                            | 11           |
| During the first year            | 1                        | 1                            |              |
| After the first year             | 3                        | 6                            |              |
| <b>Gastrointestinal disease</b>  | 3                        | 2                            | 5            |
| During the first year            | 2                        | 1                            |              |
| After the first year             | 1                        | 1                            |              |
| <b>Malignancy</b>                | 4                        | 2                            | 6            |
| During the first year            | 1                        | 0                            |              |
| After the first year             | 3                        | 2                            |              |
| <b>Diabetes de compensation</b>  | 0                        | 1                            | 1            |
| During the first year            | 0                        | 1                            |              |
| After the first year             | 0                        | 0                            |              |
| <b>Multiorgan failure</b>        | 1                        | 2                            | 3            |
| During the first year            | 1                        | 0                            |              |
| After the first year             | 0                        | 2                            |              |
| <b>Sepsis</b>                    | 2                        | 2                            | 4            |
| During the first year            | 0                        | 1                            |              |
| After the first year             | 2                        | 1                            |              |
| <b>Peripheral artery disease</b> | 0                        | 1                            | 1            |
| During the first year            | 0                        | 1                            |              |
| After the first year             | 0                        | 0                            |              |
| <b>Fall</b>                      | 0                        | 1                            | 1            |
| During the first year            | 0                        | 0                            |              |
| After the first year             | 0                        | 1                            |              |
| <b>Urinary infection</b>         | 1                        | 1                            | 2            |
| During the first year            | 0                        | 0                            |              |
| After the first year             | 1                        | 1                            |              |

**eTable 3.** Effect of the Invasive Treatment on the Rate of Each Recurrent Event While Adjusting the Estimates for Informative Censoring Due to Death as a Terminal Event

|                                          | <b>IRR</b> | <b>95% CI</b> | <b>P value</b> |
|------------------------------------------|------------|---------------|----------------|
| Reinfarction                             | 1.13       | 0.61 to 2.10  | .69            |
| Revascularization                        | 1.01       | 0.47 to 2.16  | .98            |
| Unstable angina                          | 0.50       | 0.23 to 1.08  | .08            |
| Readmission for heart failure            | 1.41       | 0.88 to 2.25  | .15            |
| Readmission for other cardiac reasons    | 0.50       | 0.23 to 1.08  | .08            |
| Stroke                                   | 1.30       | 0.25 to 6.91  | .76            |
| Readmission for bleeding                 | 4.09       | 0.90 to 18.6  | .07            |
| Readmission for other noncardiac reasons | 0.70       | 0.41 to 1.19  | .19            |

Abbreviations: IRR = Incidence rate ratio. CI = Confidence interval

**eFigure 1. CONSORT Flow Diagram**

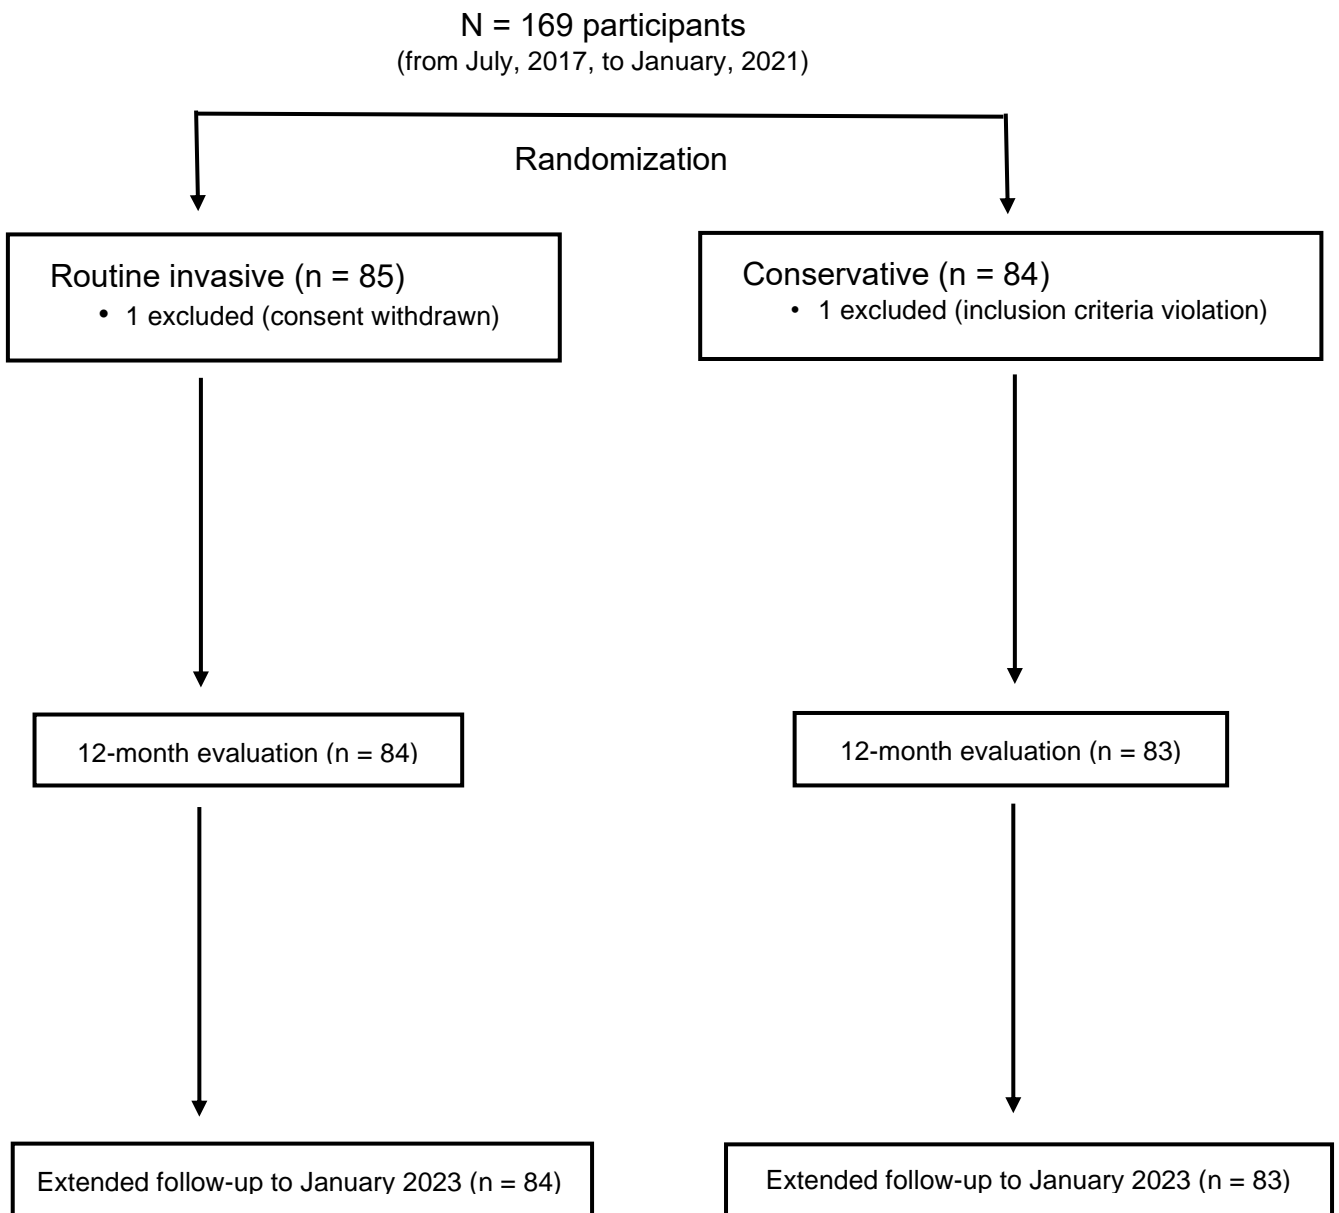

## eFigure 2. RMST Curve for All-Cause Mortality

### Subgroup Clinical Frailty Scale >4

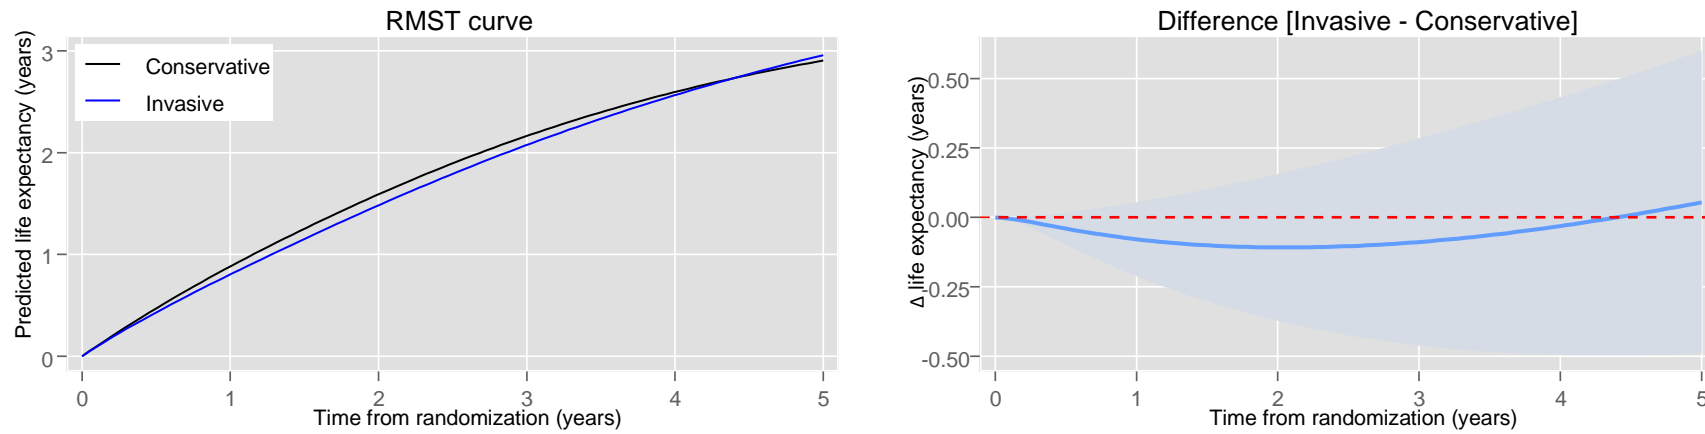

### Subgroup Clinical Frailty Scale =4

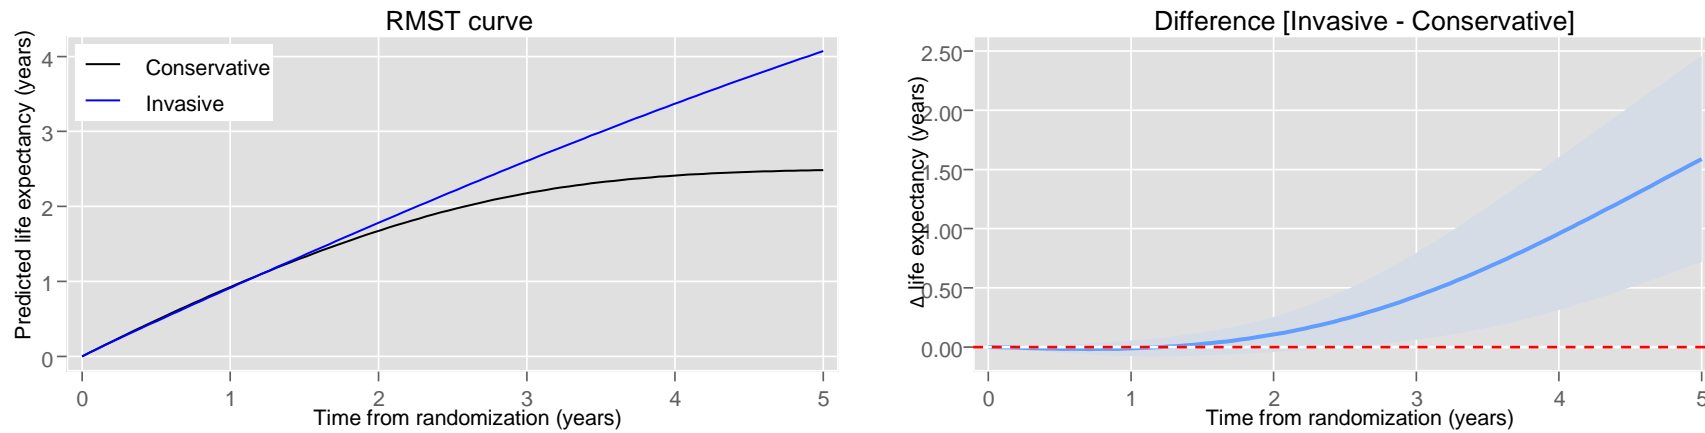

**Figure legend:** Restricted mean survival curves for all-cause mortality, comparing the conservative and invasive treatment strategies in the subgroups with Clinical Frailty scale >4 (top) and 4 (bottom), using the propensity score model. Abbreviations: RMST = Restricted mean survival time
