# Supplementary material for: Invasive Treatment Strategy in Adults With Frailty and Non–ST-Segment Elevation Myocardial Infarction: A Secondary Analysis of a Randomized Clinical Trial
Source: PubMed Central journal article supplement (PMC10918507; doi:10.1001/jamanetworkopen.2024.0809), 2024-03-06
Supplement: jamanetwopen-e240809-s003.pdf [file jamanetwopen-e240809-s003.pdf]

## Data Sharing Statement

Sanchis. Invasive Treatment Strategy in Adults With Frailty and Non–ST-Segment Elevation Myocardial Infarction. *JAMA Netw Open*. Published March 06, 2024.

doi:10.1001/jamanetworkopen.2024.0809

### Data

**Data available:** Yes

**Data types:** Deidentified participant data

**How to access data:** The MOSCA-FRAIL study is committed to responsible data sharing. Data sharing will be considered upon reasonable request. All collaborations will be made after a collaboration agreement

**When available:** With publication

### Supporting Documents

**Document types:** None

### Additional Information

**Who can access the data:** The MOSCA-FRAIL study is committed to responsible data sharing. Data sharing will be considered upon reasonable request. All collaborations will be made after a collaboration agreement

**Types of analyses:** The MOSCA-FRAIL study is committed to responsible data sharing. Data sharing will be considered upon reasonable request. All collaborations will be made after a collaboration agreement

**Mechanisms of data availability:** After approval of a proposal
